# Supplementary material for: A Retrospective Study of Ranibizumab Treatment Regimens for Neovascular Age-Related Macular Degeneration (nAMD) in Australia and the United Kingdom
Source: Springer Nature journal article supplement (doi:10.1007/s12325-017-0483-1), 2017-01-31

**Supplementary Figure 1:** Mean number of injections during the 12-months follow-up and loading phase. The difference during the 12-months follow-up was statistically significant ( $p < 0.0001$ ). Differences between T&E vs. PRN were compared using a 2-sided Wilcoxon rank sum test based on normal approximation. AUS: Australia; N: Number of eyes; PRN: pro re nata; T&E: treat-and-extend; UK: United Kingdom

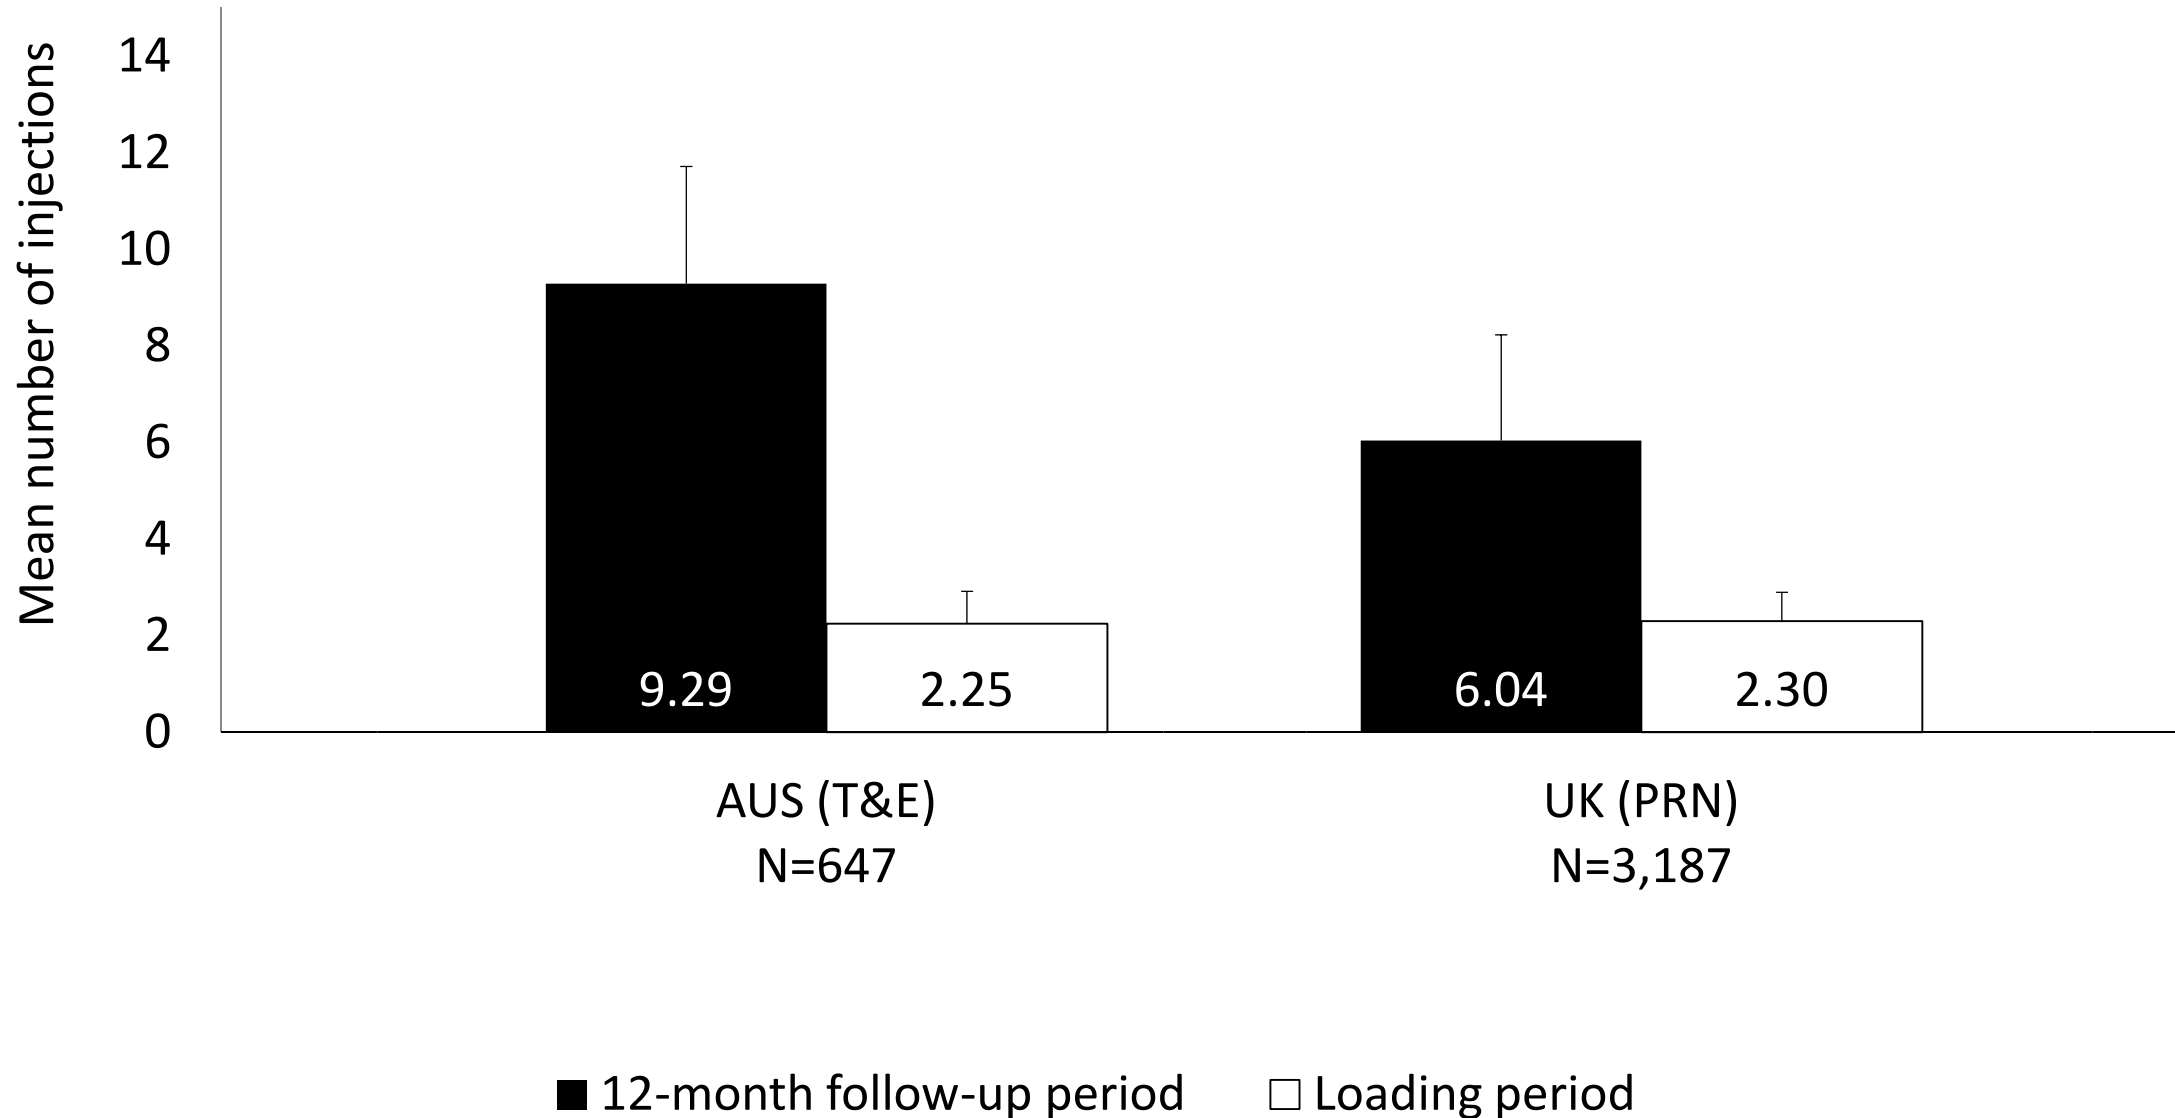

**Supplementary Figure 2:** Mean number of total visits during the 12-months follow-up. The mean number of visits during the 12-months follow-up period consists of injection and non-injection visits (i.e. monitoring visits for visual acuity, optical coherence tomography or intraocular pressure). An adjustment for potential 2-stop visits takes into account that some centres run a 2-stop service, i.e. assessment and treatment occur on different days. Differences between T&E vs. PRN were compared using a 2-sided Wilcoxon rank sum test based on normal approximation.

AUS: Australia; N: Number of eyes; PRN: pro re nata; T&E: treat-and-extend; UK: United Kingdom

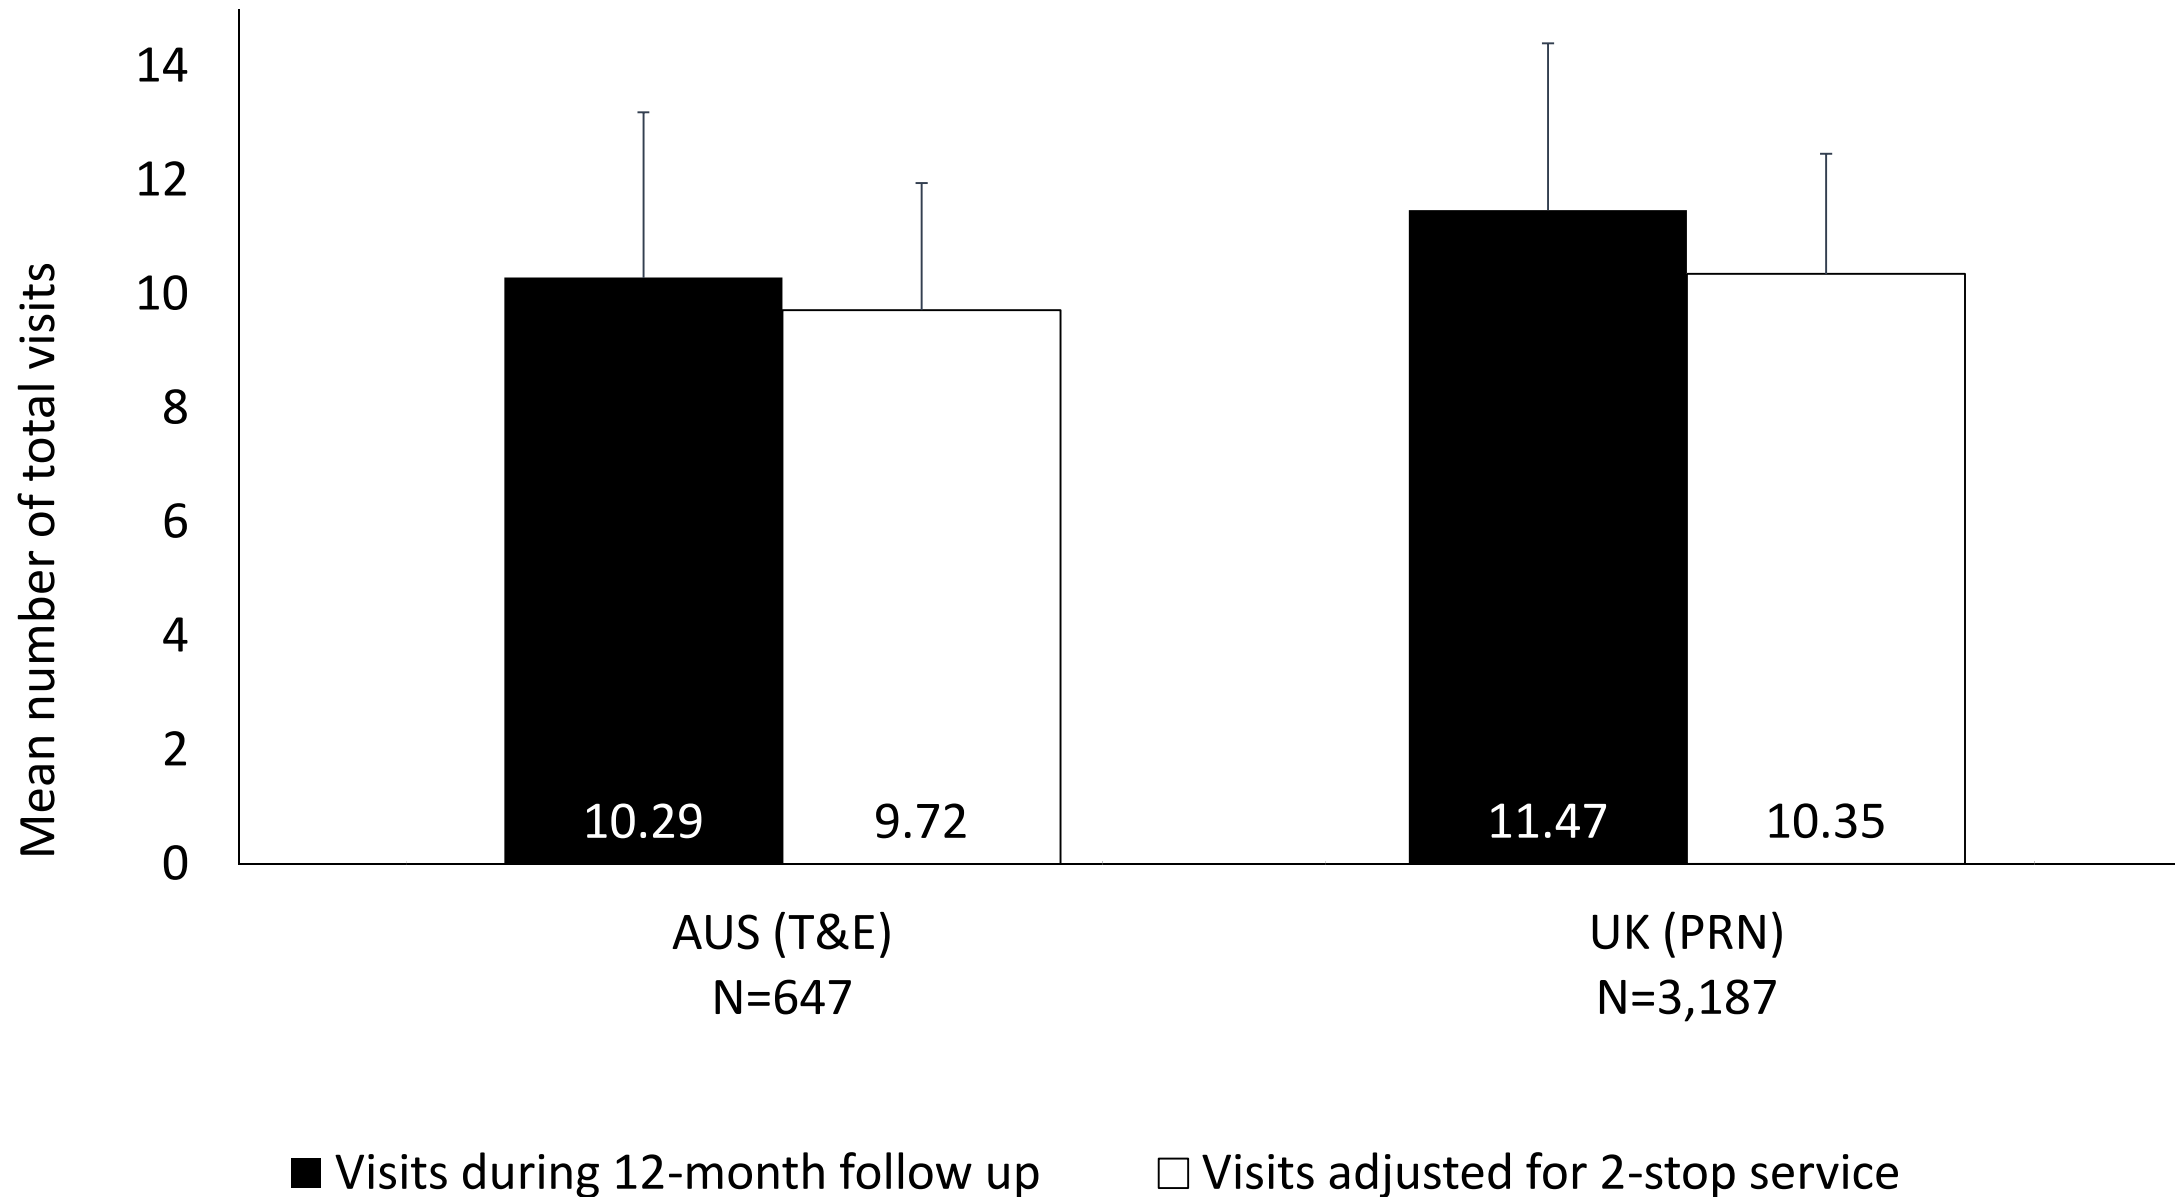

**Supplementary Figure 3:** Mean number of non-injection visits during the 12-months follow-up period. Non-injection visits represent monitoring visits for or visual acuity, optical coherence tomography or intraocular pressure. An adjustment for potential 2-stop visits takes into account that some centres run a 2-stop service, i.e. assessment and treatment occur on different days. Differences between AUS vs. PRN were compared using a 2-sided Wilcoxon rank sum test based on normal approximation.

AUS: Australia; N: Number of eyes; PRN: pro re nata; T&E: treat-and-extend; UK: United Kingdom

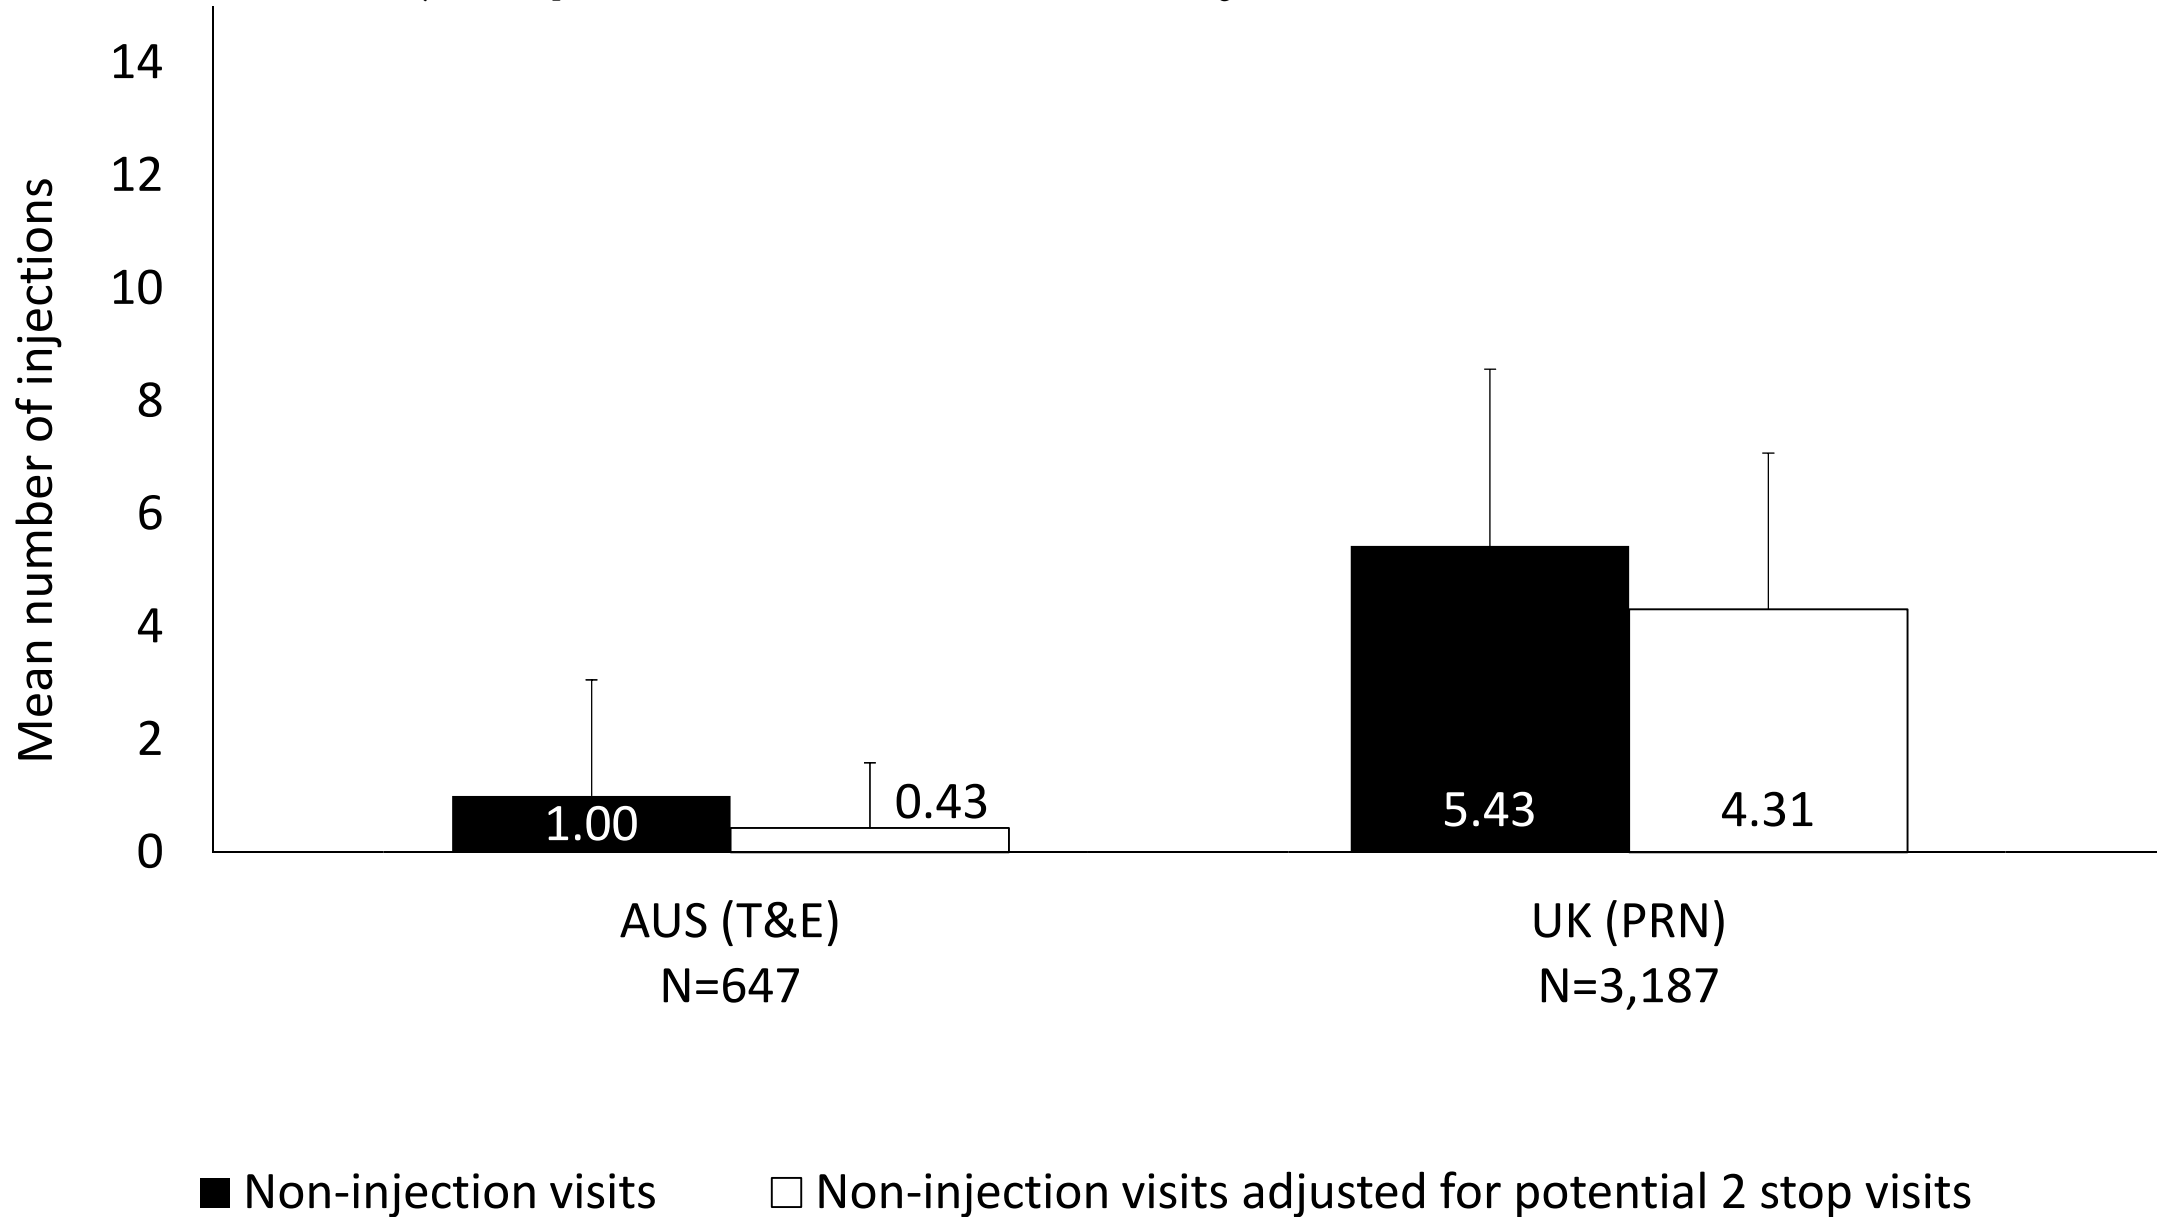

Supplement: MOESM1 [file 12029844]
